# Supplementary material for: Reevaluation of Serum Arylesterase Activity in Neurodevelopmental Disorders
Source: MDPI journal article supplement (doi:10.3390/antiox10020164), 2021-01-22
Supplement: s1 [file s1]

## SUPPLEMENTARY MATERIAL

## Reevaluation of serum arylesterase activity in neurodevelopmental disorders

**Ignazio Stefano Piras**<sup>1,2</sup>, **Stefano Gabriele**<sup>1</sup>, **Laura Altieri**<sup>1</sup>, **Federica Lombardi**<sup>1</sup>, **Roberto Sacco**<sup>1</sup>, **Carla Lintas**<sup>1</sup>, **Barbara Manzi**<sup>3</sup>, **Paolo Curatolo**<sup>3</sup>, **Maria Nobile**<sup>4</sup>, **Catia Rigoletto**<sup>4</sup>, **Massimo Molteni**<sup>4</sup>, and **Antonio M. Persico**<sup>4\*</sup>

<sup>1</sup> Unit of Child & Adolescent Neuropsychiatry, University Campus Bio-Medico, I-00128 Rome, Italy; ipiras@tgen.org (I.S.P.); stefano.gabrile@gmail.com (S.G.); laura.altieri.a@gmail.com (L.A.); federica.lombardi76@gmail.com (F.L.); r.sacco@unicampus.it (R.S.); c.lintas@unicampus.it (C.L.)

<sup>2</sup> Neurogenomics Division, The Translational Genomics Research Institute, Phoenix, AZ 85254, USA; ipiras@tgen.org

<sup>3</sup> Unit of Child and Adolescent Neuropsychiatry, University of Rome “Tor Vergata”, I-00133 Rome, Italy; bmanzi@libero.it (B.M.); curatolo@uniroma2.it (P.C.)

<sup>4</sup> Child Psychopathology Unit, Scientific Institute, IRCCS ‘E. Medea’, I-23842 Bosisio Parini (LC), Italy; maria.nobile4@gmail.com (M.N.); Catia.rigoletto@bp.lnf.it (C.R.); massimo.molteni@lanostrafamiglia.it (M.M.)

<sup>5</sup> Interdepartmental Program “Autism 0–90”, “G. Martino” University Hospital, University of Messina, I-98122 Messina, Italy

\* Correspondence: apersico@unime.it

## SUPPLEMENTARY METHODS

*Measurement of serum arylesterase<sup>1,2</sup> and diazoxonase<sup>3</sup> enzymatic activities*

To measure arylesterase, 1 µl of a 1:50 dilution of serum was added to 500 µl of substrate solution (3.26 mM phenylacetate in 9 mM Tris-HCl pH 8.0 and 0.9 mM CaCl<sub>2</sub>). Diazoxonase activity was measured by mixing in borosilicate glass tubes 2.5 µL of undiluted serum with 500 µl of substrate solution containing 0.5 mM diazoxon in 0.1 M Tris-HCl pH 8.5, 2.0 mM CaCl<sub>2</sub>, and 2.0 M NaCl. For both activities, the rate of hydrolysis was monitored in a 1-cm quartz cuvette by spectrophotometry using a SAFAS Monaco UV mc2 apparatus, measuring at 270 nm for two minutes at room temperature. Enzymatic activity was then quantified in Units/Liter, using molar extinction coefficients of 1,310 and 3,030 mol L<sup>-1</sup> cm<sup>-1</sup> for phenol and diazoxon, respectively. Serum volumes and dilutions were chosen to maintain the kinetics below 0.4 ΔOD/min and starting absorbance was kept

as low as possible (i.e., <0.2). Arylesterase and diazoxonase activities reported in this study represent the mean of 2-to-3 independent measurements, as each serum sample was independently diluted and measured twice, and a third measurement was performed if initial results differed by more than 20% of the lower value. Validation was implemented by frequent blanking (negative control) and by measuring the same test sample at least three times a day for consistency (positive control).

### Genotyping

1) *PCR amplification and restriction digest*:<sup>4</sup> The *PON1* SNP rs705379 (C-108T) was amplified using primers GACCGCAAGCCACGCCTTCTGTGCACC and TGCAGCCGAGCCCTGCTGGGGCAGCGCCGATTGGCCCGCCGC with 5% DMSO and an annealing temperature of 63°C for 35 cycles. The 109 bp fragment was digested with *Bst*UI, yielding 67 and 42 bp fragments in the presence of the C allele; (b) rs662 (Q192R) was amplified using primers TATTGTTGCTGTGGGACCTGAG and CACGCTAAACCCAAATACATCTC at an annealing temperature of 60°C for 35 cycles. The 99 bp fragment was digested with *Alw*I, yielding 66 and 33 bp fragments with the R allele.

2) *Template-directed Dye-terminator Incorporation with Fluorescence Polarization (TDI-FP)*: rs662 (Q192R) was genotyped also by TDI-FP, using the same primers as above for PCR amplification, and the following SNP primer for dye-terminator incorporation: TGATCACTATTTTCTTGACCCCTACTTAC. PCR reactions were set up using MULTIPLATE 96 well plates (MJ Research, Cat. MLP-9601), as follows:

|                     |                                |
|---------------------|--------------------------------|
| Water               | 3,55 µl                        |
| 10x buffer          | 0,62 µl                        |
| dNTPs (2,5 mM each) | 0,25 µl                        |
| Primer F (20 pM)    | 0,25 µl                        |
| Primer R (20 pM)    | 0,25 µl                        |
| Taq polimerase      | 0,08 µl                        |
| DNA (50 ng)         | 1,25 µl of a 40 ng/µl dilution |
| Total Volume        | 6,25 µl                        |

PCR reactions were then run at 95°C for 3 min, followed by 35 cycles at 95°C for 1 min, 60°C for 1 min and 72°C for 1 min, followed by 72°C for 8 min. PCR clean-up was performed in black Hard-shell Thin-Wall microplates (MJ Research), modifying the manufacturer protocol (Perkin-Elmer) with the addition of exonuclease I (New England Biolabs, code #M0293S) and alkaline phosphatase (Sigma-Aldrich, code #P-9088), as follows:

|                              |         |
|------------------------------|---------|
| Water                        | 3,63 µl |
| PCR Clean-up dilution buffer | 1,65 µl |
| Exonuclease                  | 0,04 µl |
| Alkaline phosphatase         | 0,33 µl |
| PCR Clean-up reagent 10X     | 0,2 µl  |
| PPase reagent                | 0,15 µl |
| PCR reaction                 | 1 µl    |
|                              |         |
| Total volume                 | 7 µl    |

Clean-up reactions were performed at 37°C for 60 min, followed by enzyme inactivation at 80°C for 15 min. Finally, primer extension with the fluorescent dye-terminator was performed preparing the AcycloPrime-FP Mix according to the manufacturer's instructions, as follows:

|                      |         |
|----------------------|---------|
| Water                | 9,45 µl |
| 10X Reaction buffer  | 2 µl    |
| AcycloTerminator Mix | 1 µl    |
| SNP primer (10 µM)   | 0,5 µl  |
| AcycloPol            | 0,05 µl |
|                      |         |
| Total volume         | 13 µl   |

A total of 13 µl of reaction mix was diluted to a final volume of 20 µl, placed on a thermal cycler and run at 95°C for 2 min, followed by a total of 20, 35, and 50 cycles at 95°C for 15 sec, followed by 55°C for 30 sec. After 20, 35, and 50 cycles, fluorescent polarization from R110 and TAMRA was read for 0.2 sec using a Victor2 plate reader, yielding QQ, QR, and RR genotypes. Negative and positive controls were included in each plate to ensure genotyping reliability.

3) *TaqMan® SNP Genotyping Assays*: SNP rs705379 was amplified using a PCR mixture containing approximately 500ng whole genome amplified DNA, iTAQ Supermix with ROX in a 1x concentration, TaqMan® SNP Genotyping Assay C\_\_11708905\_10 mix in a 1.2x concentration, and deionized water in a final volume of 10µl. Thermal-cycling conditions used were 95°C for 3 minutes, followed by 55 cycles of 95°C for 15 seconds and 62°C for 45 seconds. SNP rs662 was amplified using a PCR mixture containing approximately 600ng whole genome amplified DNA, iTAQ Supermix with ROX (Biorad, Hercules, CA) in a 1x concentration, TaqMan® SNP Genotyping Assay C\_\_2548962\_20 mix in a 0.6x concentration, and deionized water in a final volume of 5µl. Thermal-cycling conditions were 95°C for 3 minutes, followed by 50 cycles of 95°C for 15 seconds and 60°C for 45 seconds. Following PCR, an endpoint reading was done using the ABI Prism® 7000 Sequence Detection System.

#### *Quantitation of serum PON protein amounts by ELISA*

Serum PON protein concentrations were determined using an ELISA method, as previously described.<sup>5,6</sup> Briefly, all incubations were performed at room temperature with vigorous shaking, and wells were washed between all steps with phosphate buffer saline (PBS) containing 0.1% bovine serum albumin (BSA). Serum samples were diluted 1:4000 in 0.05M sodium carbonate buffer, added to a 96-well plate and incubated overnight. Subsequently, 1% BSA diluted in PBS was added as a blocking agent. Wells were then incubated for 1 hour with a rabbit anti-human *PON1* polyclonal antibody, obtained as previously described<sup>5</sup> and diluted 1:6400 with 1% BSA in PBS. Following washes, samples were incubated for 1 hour with a peroxidase-conjugated goat anti-rabbit IgG (Sigma-Aldrich, Saint Louis, USA). Finally, samples were exposed to the peroxidase substrate tetramethylbenzidine and its chromogenic reaction was stopped with 2M sulphuric acid. Plates were read at 450 nm using a Synergy microplate reader (BioTek Instruments Inc, Vermont, USA).

## References

1. Kitchen, B.J., Masters, C.J., Winzor, D.J. Effects of lipid removal on the molecular size and kinetic properties of bovine plasma arylesterase. *Biochem J* **1973**, *135*, 93-99. DOI: 10.1042/bj1350093
2. Furlong, C.E., Richter, R.J., Seidel, S.L., Motulsky, A.G.. Role of genetic polymorphism of human plasma paraoxonase/arylesterase in hydrolysis of the insecticide metabolites chlorpyrifos oxon and paraoxon. *Am J Hum Genet* **1988**, *43*, 230-238.
3. Richter, R., Furlong, C.E. Determination of paraoxonase (PON1) status requires more than genotyping. *Pharmacogenetics* **1999**, *9*, 745-753.
4. D'Amelio, M., Ricci, I., Sacco, R., Liu, X., D'Agruma, L., Muscarella, L.A., Guarnieri, V., Militerni, R., Bravaccio, C., Elia, M., Schneider, C., Melmed, R., Trillo, S., Pascucci, T., Puglisi-Allegra, S., Reichelt, K.L., Macciardi, F., Holden, J.J., Persico, A.M. Paraoxonase gene variants are associated with autism in North America, but not in Italy: possible regional specificity in gene-environment interactions. *Mol Psychiatry* **2005**, *10*, 1006-1016. DOI: 10.1038/sj.mp.4001714
5. Marsillach, J., Mackness, B., Mackness, M., Riu, F., Beltrán, R., Joven, J., Camps, J. Immunohistochemical analysis of paraoxonases-1, 2, and 3 expression in normal mouse tissues. *Free Radic Biol Med* **2008**, *45*, 146-157. DOI: 10.1016/j.freeradbiomed.2008.03.023
6. Marsillach, J., Camps, J., Ferré, N., Beltrán, R., Rull, A., Mackness, B., Mackness, M., Joven, J., 2009. Paraoxonase-1 is related to inflammation, fibrosis and PPAR delta in experimental liver disease. *BMC Gastroenterol* **2009**, *9*, 3. DOI: 10.1186/1471-230X-9-3

**Supplementary Table S1. Odds Ratios (O.R.) and 95% confidence intervals with relative Z statistics and P values for PON1 genotypes and alleles at SNPs rs705379 (C-108T) and rs662 (Q192R) in the different samples analyzed.**

| SNP      | Genotype/Allele |             | ASD<br>(N = 28) | ADHD<br>(N = 28) | SLI<br>(N = 52) | ASD mothers<br>(N = 26) | ASD fathers<br>(N = 23) |
|----------|-----------------|-------------|-----------------|------------------|-----------------|-------------------------|-------------------------|
| rs705379 | CC              | O.R.        | 0.6200          | 1.7222           | 1.3862          | 1.2302                  | 1.4352                  |
|          |                 | 95 % CI     | 0.1611-2.3861   | 0.5994-4.9481    | 0.5589-3.4379   | 0.3877-3.9034           | 0.4464-4.6142           |
|          |                 | z statistic | 0.695           | 1.010            | 0.705           | 0.352                   | 0.606                   |
|          |                 | P-value     | 0.4869          | 0.3127           | 0.4810          | 0.7251                  | 0.5443                  |
|          | CT              | O.R.        | 2.3684          | 0.7105           | 1.1053          | 1.1053                  | 1.0335                  |
|          |                 | 95 % CI     | 0.9269-6.0518   | 0.2958-1.7068    | 0.5430-2.2496   | 0.4513-2.7069           | 0.4051-2.6367           |
|          |                 | z statistic | 1.801           | 0.764            | 0.276           | 0.219                   | 0.069                   |
|          |                 | P-value     | 0.0716          | 0.4447           | 0.7825          | 0.8267                  | 0.9450                  |
|          | TT              | O.R.        | 0.4529          | 0.9868           | 0.6944          | 0.7675                  | 0.7353                  |
|          |                 | 95 % CI     | 0.1534-1.3373   | 0.3891-2.5025    | 0.3138-1.5367   | 0.2841-2.0738           | 0.2572-2.1019           |
|          |                 | z statistic | 1.434           | 0.028            | 0.900           | 0.522                   | 0.574                   |
|          |                 | P-value     | 0.1516          | 0.9777           | 0.3682          | 0.6019                  | 0.5661                  |
|          | C/T             | O.R.        | 1.2022          | 1.2022           | 1.2843          | 1.1889                  | 1.2715                  |
|          |                 | 95 % CI     | 0.6477-2.2312   | 0.6477-2.2312    | 0.7754-2.1273   | 0.6297-2.2447           | 0.6543-2.4707           |
|          |                 | z statistic | 0.584           | 0.584            | 0.972           | 0.534                   | 0.709                   |
|          |                 | P-value     | 0.5595          | 0.5595           | 0.3310          | 0.5935                  | 0.4785                  |
| rs662    | QQ              | O.R.        | 1.4336          | 0.5885           | 0.9111          | 1.9879                  | 0.6626                  |
|          |                 | 95 % CI     | 0.5989-3.4313   | 0.2355-1.4709    | 0.4452-1.8645   | 0.7974-4.9555           | 0.2505-1.7529           |
|          |                 | z statistic | 0.809           | 1.134            | 0.255           | 1.474                   | 0.829                   |

|     |             |               |               |               |               |               |
|-----|-------------|---------------|---------------|---------------|---------------|---------------|
|     | P-value     | 0.4186        | 0.2567        | 0.7989        | 0.1404        | 0.4070        |
| QR  | O.R.        | 0.5278        | 1.2857        | 0.8171        | 0.3343        | 1.733         |
|     | 95 % CI     | 0.2114-1.3179 | 0.5377-3.0741 | 0.3998-1.6701 | 0.1205-0.9271 | 0.6679-4.4984 |
|     | z statistic | 1.369         | 0.565         | 0.554         | 2.105         | 1.130         |
|     | P-value     | 0.1711        | 0.5720        | 0.5798        | 0.0353        | 0.2583        |
| RR  | O.R.        | 1.8889        | 1.8889        | 2.0606        | 2.0606        | 0.5152        |
|     | 95 % CI     | 0.4906-7.2720 | 0.4906-7.2720 | 0.6694-6.3433 | 0.5324-7.9760 | 0.0588-4.5161 |
|     | z statistic | 0.925         | 0.925         | 1.260         | 1.047         | 0.599         |
|     | P-value     | 0.3551        | 0.3551        | 0.2076        | 0.2951        | 0.5493        |
| Q/R | O.R.        | 1.0676        | 0.6677        | 0.8082        | 1.2631        | 0.8725        |
|     | 95 % CI     | 0.5482-2.0790 | 0.3538-1.2599 | 0.4766-1.3708 | 0.6249-2.5531 | 0.4339-1.7544 |
|     | z statistic | 0.192         | 1.247         | 0.790         | 0.650         | 0.383         |
|     | P-value     | 0.8475        | 0.2124        | 0.4296        | 0.5154        | 0.7020        |
